# Supplementary material for: Resistance to Systemic Inflammation and Multi Organ Damage after Global Ischemia/Reperfusion in the Arctic Ground Squirrel
Source: PLoS One. 2014 Apr 11;9(4):e94225. doi: 10.1371/journal.pone.0094225 (PMC3984146; doi:10.1371/journal.pone.0094225)
Supplement: Table S9 — Organ-specific histopathologic changes examined for quantitative histological analysis of tissues. (DOCX) [file pone.0094225.s012.docx]

Supporting Table 9. Organ-specific histopathologic changes examined for quantitative histological analysis of tissues.

| **Primary Tissue** | **Secondary Level** | **Change** |
| --- | --- | --- |
|
| **Skeletal Muscle** | **N/A** | Fiber Atrophy |
| Granular Degeneration |
| Lymphoid Cuffing |
| Mixed Cell Reaction |
| Parasitic Cyst |
| **Heart** | **Atria** | Hyaline Fiber Degeneration |
| Interstitial Edema |
| Lymphoid Reaction |
| Mixed Cell Reaction |
| Pyknosis |
| Vesiculation Fiber Nuclei |
| **Left Ventricle** | Granular Degeneration |
| Hyaline Fiber Degeneration |
| Interstitial Edema |
| Interstitial Fibrosis |
| Lymphoid Reaction |
| Mixed Cell Reaction |
| **Right Ventricle** | Hyaline Fiber Degeneration |
| Interstitial Edema |
| Lymphoid Reaction |
| **Vessels** | Interstitial Edema |
| **Lung** | **Bronchi** | Peribronchial Lymphoid Reaction |
| **Parenchyma** | Arteriolar Hypertrophy |
| Foreign Body |
| Congestion |
| Granuloma |
| Increased Vascular Leukocytes |
| Mixed Cell Reaction |
| Perivascular Lymphoid Reaction |
| **Spleen** | **Architecture** | Follicular Hyperplasia |
| Marginal Zone Hypertrophy |
| Arteriole Cuff Atrophy |
| Follicular Hypertrophy |
| Mantle Cell Cuff Hypertrophy |
| **Lymph Compartments** | Follicular Involution |
| Increased Volume of PALS |
| Reduced Cell Density of PALS |
| Reduced Cell Density of Follicles |
| Reduced Volume of PALS |
| **Sinus Compartment** | Erythrophagocytosis |
| Erythropoiesis |
| Sinus Atrophy |
| Lymphocytosis |
| Lymphoid Cuffing of Trabecula |
| **Liver** | **Architecture** | Accentuation of Zonation |
| Lobar Infarction |
| Lobular Necrosis |
| Peribiliary Fibrosis |
| Prominent Biliary Tracts |
| **Biliary Ducts / Portal Areas** | Periportal Lymph Cuffs |
| Periportal Mixed Cell Cuffs |
| **Hepatocellular Cytoplasm** | Decreased Perivenous Volume |
| Decreased Perivenous Density |
| Increased Perivenous Density |
| Increased Portal Density |
| Increased Perivenous Homogeneity |
| Increased Portal Homogeneity |
| Decreased Portal Volume |
| Increased Portal Volume |
| Decreased Midzone Volume |
| Midzone Vacuolation |
| **Hepatocellular Nuclei** | Anisokaryosis |
| Binucleation |
| Multinucleation |
| Pyknosis |
| Vesiculation |
| Zonal Necrosis |
| **Interstitium** | Extramedullary Hematopoiesis |
| Granulocytic Reaction |
| Granulomatous Reaction |
| Increased Endothelial Nuclei |
| Increased Endothelial Prom |
| Kupffer Cell Pigmentation |
| Lymphoid Reaction |
| **Kidney** | **Architecture** | Cortical Scarring |
| Tubular Dilation |
| Cortical Necrosis |
| **Glomeruli** | Senescence |
| **Outer Stripe Cortex** | Anisokaryosis |
| Primary Injury |
| Secondary Injury |
| Cortical Scarring |
| Protein Casts |
| Necrosis |
| **Inner Stripe Cortex** | Primary Injury |
| Protein Casts |
| Secondary Injury |
| Intranephronic Calculosis |
| Anisokaryosis |
| Necrosis |
| **Medulla** | Primary Injury |
| Protein Casts |
| Intranephronic Calculosis |
| **Interstitium** | Arter Embolism |
| Lymphoid Cuffing |
| Reticulin Sclerosis |
| **Small Intestine** | **N/A** | Submucosal Lymph Follicles |
| Epitheliotropic Lymphoid Reaction |
| Increased Epithelial Lymphs |
| Increased Subepithelial Lymphs |
| **Large Intestine** | **N/A** | Increased Subepithelial Lymphs |
| Submucosal Cell Reaction |
| Submucosal Lymph Follicles |
